# Supplementary material for: Combination of canagliflozin and puerarin alleviates the lipotoxicity to diabetic kidney in mice
Source: PubMed Central journal article supplement — Korean J Physiol Pharmacol. 2023 May 1;27(3):221–30. doi: 10.4196/kjpp.2023.27.3.221 (PMC10122997; doi:10.4196/kjpp.2023.27.3.221), 2023-05-01
Supplement: kjpp-27-3-221-supple.pdf [file kjpp-27-3-221-supple.pdf]

**Supplementary Table 1. Influence of canagliflozin and puerarin on body weights in diabetes mice**

| Age  | Control    |                         |                          | Diabetes                 |                           |                           | Can                       |                           |                           | Pue (mg/kg)               |                           |                           |                           |                           |                           | Can + Pue (mg/kg of Pue)  |                           |                           |                           |  |  |
|------|------------|-------------------------|--------------------------|--------------------------|---------------------------|---------------------------|---------------------------|---------------------------|---------------------------|---------------------------|---------------------------|---------------------------|---------------------------|---------------------------|---------------------------|---------------------------|---------------------------|---------------------------|---------------------------|--|--|
|      | 4          | 10                      | 40                       | 4                        | 10                        | 40                        | 4                         | 10                        | 40                        | 100                       | 4                         | 10                        | 40                        | 100                       | 4                         | 10                        | 40                        | 100                       |                           |  |  |
| 10 w | 24.1 ± 0.5 | 24.1 ± 0.9              | 24.3 ± 0.7               | 24.0 ± 0.8               | 24.3 ± 0.6                | 24.3 ± 0.5                | 24.7 ± 0.8                | 24.2 ± 0.9                | 23.6 ± 0.6                | 24.1 ± 0.7                | 24.2 ± 0.9                | 23.6 ± 0.6                | 24.1 ± 0.7                | 24.7 ± 0.8                | 24.2 ± 0.9                | 23.6 ± 0.6                | 24.1 ± 0.7                | 24.7 ± 0.8                | 24.2 ± 1.4                |  |  |
| 11 w | 24.9 ± 0.5 | 25.6 ± 0.5              | 25.2 ± 0.4               | 25.3 ± 0.7               | 25.3 ± 0.6                | 25.4 ± 0.4                | 25.4 ± 0.7                | 25.5 ± 0.9                | 25.1 ± 1.0                | 25.2 ± 0.4                | 25.5 ± 0.9                | 25.1 ± 1.0                | 25.2 ± 0.4                | 25.4 ± 0.7                | 25.5 ± 0.9                | 25.1 ± 1.0                | 25.2 ± 0.4                | 25.4 ± 0.7                | 25.5 ± 1.0                |  |  |
| 12 w | 25.6 ± 0.3 | 26.6 ± 0.4              | 26.1 ± 0.3               | 26.7 ± 0.9               | 26.3 ± 1.4                | 26.2 ± 0.4                | 26.9 ± 0.7                | 26.7 ± 0.6                | 26.3 ± 1.7                | 26.0 ± 0.4                | 26.7 ± 0.6                | 26.3 ± 1.7                | 26.0 ± 0.4                | 26.9 ± 0.7                | 26.7 ± 0.6                | 26.3 ± 1.7                | 26.0 ± 0.4                | 26.9 ± 0.7                | 26.4 ± 1.2                |  |  |
| 13 w | 26.4 ± 0.5 | 28.2 ± 0.7 <sup>#</sup> | 26.9 ± 0.2 <sup>**</sup> | 28.7 ± 0.8 <sup>##</sup> | 28.5 ± 0.7 <sup>##^</sup> | 27.4 ± 0.4 <sup>#</sup>   | 28.0 ± 0.9 <sup>##^</sup> | 27.3 ± 1.0                | 27.5 ± 1.3 <sup>#</sup>   | 26.5 ± 0.4 <sup>**</sup>  | 27.3 ± 1.0                | 27.5 ± 1.3 <sup>#</sup>   | 26.5 ± 0.4 <sup>**</sup>  | 28.0 ± 0.9 <sup>##^</sup> | 27.3 ± 1.0                | 27.5 ± 1.3 <sup>#</sup>   | 26.5 ± 0.4 <sup>**</sup>  | 28.0 ± 0.9 <sup>##^</sup> | 27.6 ± 1.3 <sup>#</sup>   |  |  |
| 14 w | 27.7 ± 0.4 | 30.2 ± 1.0 <sup>#</sup> | 27.8 ± 0.3 <sup>**</sup> | 30.4 ± 0.9 <sup>##</sup> | 30.1 ± 0.6 <sup>##^</sup> | 28.2 ± 0.4 <sup>**</sup>  | 28.4 ± 0.7 <sup>**</sup>  | 28.8 ± 0.6 <sup>##^</sup> | 28.5 ± 1.2 <sup>##</sup>  | 27.5 ± 0.5 <sup>**</sup>  | 28.8 ± 0.6 <sup>##^</sup> | 28.5 ± 1.2 <sup>##</sup>  | 27.5 ± 0.5 <sup>**</sup>  | 28.4 ± 0.7 <sup>**</sup>  | 28.8 ± 0.6 <sup>##^</sup> | 28.5 ± 1.2 <sup>##</sup>  | 27.5 ± 0.5 <sup>**</sup>  | 28.4 ± 0.7 <sup>**</sup>  | 28.7 ± 0.6 <sup>##^</sup> |  |  |
| 15 w | 28.3 ± 0.5 | 32.7 ± 0.8 <sup>#</sup> | 28.3 ± 0.4 <sup>**</sup> | 31.0 ± 0.8 <sup>##</sup> | 30.8 ± 0.9 <sup>##^</sup> | 29.6 ± 0.5 <sup>##^</sup> | 29.5 ± 0.5 <sup>##^</sup> | 30.1 ± 0.6 <sup>##^</sup> | 29.9 ± 0.8 <sup>##^</sup> | 28.4 ± 0.4 <sup>**</sup>  | 30.1 ± 0.6 <sup>##^</sup> | 29.9 ± 0.8 <sup>##^</sup> | 28.4 ± 0.4 <sup>**</sup>  | 29.5 ± 0.5 <sup>##^</sup> | 30.1 ± 0.6 <sup>##^</sup> | 29.9 ± 0.8 <sup>##^</sup> | 28.4 ± 0.4 <sup>**</sup>  | 29.5 ± 0.5 <sup>##^</sup> | 28.7 ± 0.7 <sup>##^</sup> |  |  |
| 16 w | 28.9 ± 0.6 | 34.8 ± 0.8 <sup>#</sup> | 29.1 ± 0.4 <sup>**</sup> | 34.3 ± 0.9 <sup>##</sup> | 33.4 ± 1.3 <sup>##^</sup> | 31.7 ± 0.8 <sup>##^</sup> | 31.8 ± 0.9 <sup>##^</sup> | 31.8 ± 0.9 <sup>##^</sup> | 31.0 ± 0.9 <sup>##^</sup> | 31.8 ± 0.9 <sup>##^</sup> | 31.8 ± 0.9 <sup>##^</sup> | 31.0 ± 0.9 <sup>##^</sup> | 31.8 ± 0.9 <sup>##^</sup> | 31.8 ± 0.9 <sup>##^</sup> | 31.8 ± 0.9 <sup>##^</sup> | 31.0 ± 0.9 <sup>##^</sup> | 31.8 ± 0.9 <sup>##^</sup> | 31.8 ± 0.9 <sup>##^</sup> | 29.8 ± 0.9 <sup>##^</sup> |  |  |
| 17 w | 30.3 ± 0.7 | 36.5 ± 0.4 <sup>#</sup> | 30.2 ± 0.6 <sup>**</sup> | 35.3 ± 1.1 <sup>##</sup> | 34.4 ± 1.2 <sup>##^</sup> | 33.0 ± 0.7 <sup>##^</sup> | 33.1 ± 1.0 <sup>##^</sup> | 31.0 ± 1.6 <sup>**</sup>  | 31.2 ± 0.7 <sup>##</sup>  | 33.1 ± 1.0 <sup>##^</sup> | 31.0 ± 1.6 <sup>**</sup>  | 31.2 ± 0.7 <sup>##</sup>  | 30.3 ± 0.5 <sup>**</sup>  | 33.1 ± 1.0 <sup>##^</sup> | 31.0 ± 1.6 <sup>**</sup>  | 31.2 ± 0.7 <sup>##</sup>  | 30.3 ± 0.5 <sup>**</sup>  | 33.1 ± 1.0 <sup>##^</sup> | 30.1 ± 0.3 <sup>**</sup>  |  |  |
| 18 w | 32.2 ± 1.3 | 38.5 ± 0.7 <sup>#</sup> | 31.5 ± 0.5 <sup>**</sup> | 36.7 ± 1.2 <sup>##</sup> | 35.7 ± 0.7 <sup>##^</sup> | 34.8 ± 1.0 <sup>##^</sup> | 33.8 ± 0.8 <sup>##^</sup> | 32.4 ± 1.4 <sup>**</sup>  | 31.7 ± 0.6 <sup>**</sup>  | 33.8 ± 0.8 <sup>##^</sup> | 32.4 ± 1.4 <sup>**</sup>  | 31.7 ± 0.6 <sup>**</sup>  | 31.5 ± 0.3 <sup>**</sup>  | 33.8 ± 0.8 <sup>##^</sup> | 32.4 ± 1.4 <sup>**</sup>  | 31.7 ± 0.6 <sup>**</sup>  | 31.5 ± 0.3 <sup>**</sup>  | 33.8 ± 0.8 <sup>##^</sup> | 30.1 ± 0.5 <sup>**</sup>  |  |  |
| 19 w | 32.9 ± 1.7 | 39.5 ± 0.6 <sup>#</sup> | 33.0 ± 0.8 <sup>**</sup> | 39.0 ± 0.8 <sup>##</sup> | 38.2 ± 0.8 <sup>##^</sup> | 35.9 ± 0.7 <sup>##^</sup> | 35.0 ± 0.7 <sup>##^</sup> | 33.7 ± 0.9 <sup>**</sup>  | 32.2 ± 0.7 <sup>**</sup>  | 35.0 ± 0.7 <sup>##^</sup> | 33.7 ± 0.9 <sup>**</sup>  | 32.2 ± 0.7 <sup>**</sup>  | 32.7 ± 0.8 <sup>**</sup>  | 35.0 ± 0.7 <sup>##^</sup> | 33.7 ± 0.9 <sup>**</sup>  | 32.2 ± 0.7 <sup>**</sup>  | 32.7 ± 0.8 <sup>**</sup>  | 35.0 ± 0.7 <sup>##^</sup> | 31.4 ± 0.6 <sup>##^</sup> |  |  |
| 20 w | 32.7 ± 1.5 | 39.6 ± 0.7 <sup>#</sup> | 33.1 ± 0.5 <sup>**</sup> | 39.4 ± 0.8 <sup>##</sup> | 39.3 ± 0.7 <sup>##^</sup> | 35.9 ± 0.8 <sup>##^</sup> | 35.1 ± 0.9 <sup>##^</sup> | 33.4 ± 1.1 <sup>**</sup>  | 33.1 ± 0.8 <sup>**</sup>  | 35.1 ± 0.9 <sup>##^</sup> | 33.4 ± 1.1 <sup>**</sup>  | 33.1 ± 0.8 <sup>**</sup>  | 32.4 ± 1.2 <sup>**</sup>  | 35.1 ± 0.9 <sup>##^</sup> | 33.4 ± 1.1 <sup>**</sup>  | 33.1 ± 0.8 <sup>**</sup>  | 32.4 ± 1.2 <sup>**</sup>  | 35.1 ± 0.9 <sup>##^</sup> | 31.5 ± 0.4 <sup>##^</sup> |  |  |
| 21 w | 32.7 ± 0.9 | 39.8 ± 0.9 <sup>#</sup> | 33.6 ± 0.9 <sup>**</sup> | 39.7 ± 0.8 <sup>##</sup> | 39.3 ± 0.7 <sup>##^</sup> | 35.9 ± 0.7 <sup>##^</sup> | 35.1 ± 0.5 <sup>##^</sup> | 33.3 ± 0.9 <sup>**</sup>  | 32.8 ± 0.8 <sup>**</sup>  | 35.1 ± 0.5 <sup>##^</sup> | 33.3 ± 0.9 <sup>**</sup>  | 32.8 ± 0.8 <sup>**</sup>  | 32.5 ± 0.8 <sup>**</sup>  | 35.1 ± 0.5 <sup>##^</sup> | 33.3 ± 0.9 <sup>**</sup>  | 32.8 ± 0.8 <sup>**</sup>  | 32.5 ± 0.8 <sup>**</sup>  | 35.1 ± 0.5 <sup>##^</sup> | 32.0 ± 0.6 <sup>##^</sup> |  |  |
| 22 w | 33.0 ± 1.1 | 39.6 ± 0.9 <sup>#</sup> | 33.9 ± 0.5 <sup>**</sup> | 39.6 ± 0.4 <sup>##</sup> | 39.2 ± 1.1 <sup>##^</sup> | 36.4 ± 0.7 <sup>##^</sup> | 34.8 ± 0.7 <sup>##^</sup> | 33.6 ± 0.5 <sup>**</sup>  | 33.4 ± 1.3 <sup>**</sup>  | 34.8 ± 0.7 <sup>##^</sup> | 33.6 ± 0.5 <sup>**</sup>  | 33.4 ± 1.3 <sup>**</sup>  | 32.7 ± 1.0 <sup>**</sup>  | 34.8 ± 0.7 <sup>##^</sup> | 33.6 ± 0.5 <sup>**</sup>  | 33.4 ± 1.3 <sup>**</sup>  | 32.7 ± 1.0 <sup>**</sup>  | 34.8 ± 0.7 <sup>##^</sup> | 32.3 ± 0.7 <sup>##^</sup> |  |  |

Data are presented as the mean ± SD (n = 6). <sup>#</sup> p < 0.05, <sup>##</sup> p < 0.01 vs. Control; \*p < 0.05, \*\*p < 0.01 vs. Diabetes; <sup>^</sup> p < 0.05, <sup>^^</sup> p < 0.01 vs. Can.

**Supplementary Table 2. Influence of canagliflozin and puerarin on blood glucose in diabetes mice**

| Age  | Control   |                         |                           | Diabetes                  |                           |                           | Can                       |                           |                           | Pue (mg/kg)               |                           |                           |                           |                           |                           | Can + Pue (mg/kg of Pue)  |                           |                           |                           |
|------|-----------|-------------------------|---------------------------|---------------------------|---------------------------|---------------------------|---------------------------|---------------------------|---------------------------|---------------------------|---------------------------|---------------------------|---------------------------|---------------------------|---------------------------|---------------------------|---------------------------|---------------------------|---------------------------|
|      | 4         | 10                      | 40                        | 4                         | 10                        | 40                        | 4                         | 10                        | 40                        | 100                       | 4                         | 10                        | 40                        | 100                       | 4                         | 10                        | 40                        | 100                       |                           |
| 10 w | 6.1 ± 0.4 | 18.1 ± 0.9 <sup>#</sup> | 19.2 ± 1.8 <sup>#</sup>   | 18.8 ± 2.0 <sup>#</sup>   | 18.8 ± 2.0 <sup>#</sup>   | 18.6 ± 1.1 <sup>#</sup>   | 19.5 ± 1.7 <sup>#</sup>   | 18.6 ± 1.7 <sup>#</sup>   | 19.6 ± 2.1 <sup>#</sup>   | 18.8 ± 1.4 <sup>#</sup>   | 19.5 ± 2.0 <sup>#</sup>   | 18.6 ± 1.7 <sup>#</sup>   | 19.6 ± 2.1 <sup>#</sup>   | 18.8 ± 1.4 <sup>#</sup>   | 19.5 ± 2.0 <sup>#</sup>   | 18.6 ± 1.7 <sup>#</sup>   | 19.6 ± 2.1 <sup>#</sup>   | 18.8 ± 1.4 <sup>#</sup>   | 19.5 ± 2.0 <sup>#</sup>   |
| 11 w | 6.4 ± 0.5 | 19.6 ± 1.4 <sup>#</sup> | 13.2 ± 1.2 <sup>#**</sup> | 18.0 ± 1.7 <sup>#**</sup> | 17.0 ± 1.5 <sup>#**</sup> | 16.1 ± 0.6 <sup>#**</sup> | 17.4 ± 0.9 <sup>#**</sup> | 12.8 ± 0.9 <sup>#**</sup> | 13.4 ± 1.4 <sup>#**</sup> | 12.7 ± 1.6 <sup>#**</sup> | 17.4 ± 0.9 <sup>#**</sup> | 12.8 ± 0.9 <sup>#**</sup> | 13.4 ± 1.4 <sup>#**</sup> | 12.7 ± 1.6 <sup>#**</sup> | 17.4 ± 0.9 <sup>#**</sup> | 12.8 ± 0.9 <sup>#**</sup> | 13.4 ± 1.4 <sup>#**</sup> | 12.7 ± 1.6 <sup>#**</sup> | 17.4 ± 0.9 <sup>#**</sup> |
| 12 w | 6.4 ± 0.4 | 22.3 ± 2.3 <sup>#</sup> | 8.6 ± 1.5 <sup>#**</sup>  | 16.3 ± 1.8 <sup>#**</sup> | 18.4 ± 1.1 <sup>#**</sup> | 15.0 ± 0.9 <sup>#**</sup> | 16.3 ± 0.6 <sup>#**</sup> | 11.3 ± 0.7 <sup>#**</sup> | 10.2 ± 0.5 <sup>#**</sup> | 8.4 ± 0.5 <sup>#**</sup>  | 16.3 ± 0.6 <sup>#**</sup> | 11.3 ± 0.7 <sup>#**</sup> | 10.2 ± 0.5 <sup>#**</sup> | 8.4 ± 0.5 <sup>#**</sup>  | 16.3 ± 0.6 <sup>#**</sup> | 11.3 ± 0.7 <sup>#**</sup> | 10.2 ± 0.5 <sup>#**</sup> | 8.4 ± 0.5 <sup>#**</sup>  | 16.3 ± 0.6 <sup>#**</sup> |
| 13 w | 6.0 ± 0.4 | 22.5 ± 1.0 <sup>#</sup> | 8.2 ± 1.1 <sup>#**</sup>  | 17.5 ± 1.2 <sup>#**</sup> | 18.3 ± 2.3 <sup>#**</sup> | 13.1 ± 0.9 <sup>#**</sup> | 14.2 ± 0.7 <sup>#**</sup> | 9.9 ± 0.4 <sup>#**</sup>  | 8.7 ± 1.0 <sup>#**</sup>  | 7.7 ± 0.6 <sup>#**</sup>  | 14.2 ± 0.7 <sup>#**</sup> | 9.9 ± 0.4 <sup>#**</sup>  | 8.7 ± 1.0 <sup>#**</sup>  | 7.7 ± 0.6 <sup>#**</sup>  | 14.2 ± 0.7 <sup>#**</sup> | 9.9 ± 0.4 <sup>#**</sup>  | 8.7 ± 1.0 <sup>#**</sup>  | 7.7 ± 0.6 <sup>#**</sup>  | 14.2 ± 0.7 <sup>#**</sup> |
| 14 w | 5.9 ± 0.4 | 21.7 ± 1.0 <sup>#</sup> | 7.1 ± 0.9 <sup>#**</sup>  | 17.0 ± 1.7 <sup>#**</sup> | 18.0 ± 1.7 <sup>#**</sup> | 12.1 ± 1.0 <sup>#**</sup> | 14.1 ± 0.7 <sup>#**</sup> | 9.2 ± 0.5 <sup>#**</sup>  | 7.2 ± 0.5 <sup>#**</sup>  | 6.9 ± 0.4 <sup>#</sup>    | 14.1 ± 0.7 <sup>#**</sup> | 9.2 ± 0.5 <sup>#**</sup>  | 7.2 ± 0.5 <sup>#**</sup>  | 6.9 ± 0.4 <sup>#</sup>    | 14.1 ± 0.7 <sup>#**</sup> | 9.2 ± 0.5 <sup>#**</sup>  | 7.2 ± 0.5 <sup>#**</sup>  | 6.9 ± 0.4 <sup>#</sup>    | 14.1 ± 0.7 <sup>#**</sup> |
| 15 w | 6.2 ± 0.5 | 22.9 ± 1.8 <sup>#</sup> | 7.9 ± 0.6 <sup>#**</sup>  | 17.8 ± 1.3 <sup>#**</sup> | 17.3 ± 2.0 <sup>#**</sup> | 11.2 ± 0.9 <sup>#**</sup> | 12.4 ± 1.7 <sup>#**</sup> | 8.4 ± 0.4 <sup>#**</sup>  | 7.3 ± 0.6 <sup>#**</sup>  | 6.9 ± 0.4 <sup>#</sup>    | 12.4 ± 1.7 <sup>#**</sup> | 8.4 ± 0.4 <sup>#**</sup>  | 7.3 ± 0.6 <sup>#**</sup>  | 6.9 ± 0.4 <sup>#</sup>    | 12.4 ± 1.7 <sup>#**</sup> | 8.4 ± 0.4 <sup>#**</sup>  | 7.3 ± 0.6 <sup>#**</sup>  | 6.9 ± 0.4 <sup>#</sup>    | 12.4 ± 1.7 <sup>#**</sup> |
| 16 w | 6.2 ± 0.3 | 23.1 ± 1.8 <sup>#</sup> | 7.5 ± 0.5 <sup>#**</sup>  | 16.3 ± 1.5 <sup>#**</sup> | 18.1 ± 2.1 <sup>#**</sup> | 10.4 ± 0.4 <sup>#**</sup> | 10.4 ± 1.1 <sup>#**</sup> | 8.1 ± 0.6 <sup>#**</sup>  | 7.3 ± 0.5 <sup>#**</sup>  | 6.6 ± 0.5 <sup>#**</sup>  | 10.4 ± 1.1 <sup>#**</sup> | 8.1 ± 0.6 <sup>#**</sup>  | 7.3 ± 0.5 <sup>#**</sup>  | 6.6 ± 0.5 <sup>#**</sup>  | 10.4 ± 1.1 <sup>#**</sup> | 8.1 ± 0.6 <sup>#**</sup>  | 7.3 ± 0.5 <sup>#**</sup>  | 6.6 ± 0.5 <sup>#**</sup>  | 10.4 ± 1.1 <sup>#**</sup> |
| 17 w | 6.0 ± 0.3 | 23.6 ± 2.1 <sup>#</sup> | 7.4 ± 0.6 <sup>#**</sup>  | 15.5 ± 1.2 <sup>#**</sup> | 18.7 ± 2.9 <sup>#**</sup> | 10.4 ± 0.9 <sup>#**</sup> | 10.6 ± 1.3 <sup>#**</sup> | 7.7 ± 0.3 <sup>#**</sup>  | 6.9 ± 0.5 <sup>#**</sup>  | 6.8 ± 0.9 <sup>#**</sup>  | 10.6 ± 1.3 <sup>#**</sup> | 7.7 ± 0.3 <sup>#**</sup>  | 6.9 ± 0.5 <sup>#**</sup>  | 6.8 ± 0.9 <sup>#**</sup>  | 10.6 ± 1.3 <sup>#**</sup> | 7.7 ± 0.3 <sup>#**</sup>  | 6.9 ± 0.5 <sup>#**</sup>  | 6.8 ± 0.9 <sup>#**</sup>  | 10.6 ± 1.3 <sup>#**</sup> |
| 18 w | 5.7 ± 0.5 | 23.2 ± 0.9 <sup>#</sup> | 6.8 ± 0.4 <sup>#**</sup>  | 16.0 ± 1.7 <sup>#**</sup> | 17.8 ± 3.0 <sup>#**</sup> | 10.6 ± 0.6 <sup>#**</sup> | 10.1 ± 0.3 <sup>#**</sup> | 7.5 ± 0.3 <sup>#**</sup>  | 6.9 ± 0.3 <sup>#**</sup>  | 6.5 ± 0.3 <sup>#**</sup>  | 10.1 ± 0.3 <sup>#**</sup> | 7.5 ± 0.3 <sup>#**</sup>  | 6.9 ± 0.3 <sup>#**</sup>  | 6.5 ± 0.3 <sup>#**</sup>  | 10.1 ± 0.3 <sup>#**</sup> | 7.5 ± 0.3 <sup>#**</sup>  | 6.9 ± 0.3 <sup>#**</sup>  | 6.5 ± 0.3 <sup>#**</sup>  | 10.1 ± 0.3 <sup>#**</sup> |
| 19 w | 6.1 ± 0.5 | 22.5 ± 2.8 <sup>#</sup> | 7.3 ± 0.5 <sup>#**</sup>  | 16.3 ± 1.6 <sup>#**</sup> | 17.9 ± 2.0 <sup>#**</sup> | 10.7 ± 0.7 <sup>#**</sup> | 10.0 ± 0.8 <sup>#**</sup> | 7.3 ± 1.0 <sup>#**</sup>  | 6.6 ± 0.5 <sup>#**</sup>  | 6.4 ± 0.3 <sup>#**</sup>  | 10.0 ± 0.8 <sup>#**</sup> | 7.3 ± 1.0 <sup>#**</sup>  | 6.6 ± 0.5 <sup>#**</sup>  | 6.4 ± 0.3 <sup>#**</sup>  | 10.0 ± 0.8 <sup>#**</sup> | 7.3 ± 1.0 <sup>#**</sup>  | 6.6 ± 0.5 <sup>#**</sup>  | 6.4 ± 0.3 <sup>#**</sup>  | 10.0 ± 0.8 <sup>#**</sup> |
| 20 w | 6.1 ± 0.5 | 23.5 ± 1.7 <sup>#</sup> | 7.3 ± 0.4 <sup>#**</sup>  | 16.3 ± 1.2 <sup>#**</sup> | 18.8 ± 1.8 <sup>#**</sup> | 10.6 ± 0.8 <sup>#**</sup> | 9.1 ± 0.8 <sup>#**</sup>  | 7.4 ± 0.5 <sup>#**</sup>  | 6.2 ± 0.8 <sup>#**</sup>  | 6.5 ± 0.2 <sup>#**</sup>  | 9.1 ± 0.8 <sup>#**</sup>  | 7.4 ± 0.5 <sup>#**</sup>  | 6.2 ± 0.8 <sup>#**</sup>  | 6.5 ± 0.2 <sup>#**</sup>  | 9.1 ± 0.8 <sup>#**</sup>  | 7.4 ± 0.5 <sup>#**</sup>  | 6.2 ± 0.8 <sup>#**</sup>  | 6.5 ± 0.2 <sup>#**</sup>  | 9.1 ± 0.8 <sup>#**</sup>  |
| 21 w | 6.1 ± 0.5 | 23.9 ± 1.3 <sup>#</sup> | 7.0 ± 0.6 <sup>#**</sup>  | 17.5 ± 1.2 <sup>#**</sup> | 17.1 ± 2.1 <sup>#**</sup> | 10.3 ± 0.6 <sup>#**</sup> | 9.1 ± 0.5 <sup>#**</sup>  | 7.3 ± 0.3 <sup>#**</sup>  | 6.0 ± 0.9 <sup>#**</sup>  | 5.9 ± 0.3 <sup>#**</sup>  | 9.1 ± 0.5 <sup>#**</sup>  | 7.3 ± 0.3 <sup>#**</sup>  | 6.0 ± 0.9 <sup>#**</sup>  | 5.9 ± 0.3 <sup>#**</sup>  | 9.1 ± 0.5 <sup>#**</sup>  | 7.3 ± 0.3 <sup>#**</sup>  | 6.0 ± 0.9 <sup>#**</sup>  | 5.9 ± 0.3 <sup>#**</sup>  | 9.1 ± 0.5 <sup>#**</sup>  |
| 22 w | 6.2 ± 0.6 | 23.1 ± 2.2 <sup>#</sup> | 6.3 ± 0.4 <sup>#**</sup>  | 17.8 ± 1.8 <sup>#**</sup> | 18.0 ± 2.4 <sup>#**</sup> | 10.8 ± 0.9 <sup>#**</sup> | 9.5 ± 0.7 <sup>#**</sup>  | 7.0 ± 0.2 <sup>#**</sup>  | 5.9 ± 0.3 <sup>#**</sup>  | 5.9 ± 0.3 <sup>#**</sup>  | 9.5 ± 0.7 <sup>#**</sup>  | 7.0 ± 0.2 <sup>#**</sup>  | 5.9 ± 0.3 <sup>#**</sup>  | 5.9 ± 0.3 <sup>#**</sup>  | 9.5 ± 0.7 <sup>#**</sup>  | 7.0 ± 0.2 <sup>#**</sup>  | 5.9 ± 0.3 <sup>#**</sup>  | 5.9 ± 0.3 <sup>#**</sup>  | 9.5 ± 0.7 <sup>#**</sup>  |

Data are presented as the mean ± SD (n = 6). <sup>#</sup> p < 0.05, <sup>#\*</sup> p < 0.01 vs. Control; <sup>#\*</sup> p < 0.05, <sup>#\*\*</sup> p < 0.01 vs. Diabetes; <sup>^</sup> p < 0.05, <sup>^^</sup> p < 0.01 vs. Can.

**Supplementary Table 3. Influence of canagliflozin and puerarin on water and food intake in diabetes mice**

| Age                   | Control |           |                         | Diabetes                  |                           |                           | Can                        |                             |                           | Pue (mg/kg)               |                           |                            |     |   |    | Can + Pue (mg/kg of Pue) |     |   |    |    |     |  |  |
|-----------------------|---------|-----------|-------------------------|---------------------------|---------------------------|---------------------------|----------------------------|-----------------------------|---------------------------|---------------------------|---------------------------|----------------------------|-----|---|----|--------------------------|-----|---|----|----|-----|--|--|
|                       | 4       | 10        | 40                      | 4                         | 10                        | 40                        | 4                          | 10                          | 40                        | 4                         | 10                        | 40                         | 100 | 4 | 10 | 40                       | 100 | 4 | 10 | 40 | 100 |  |  |
| Water intake (ml/day) | 10 w    | 2.6 ± 0.4 | 16.1 ± 0.8 <sup>#</sup> | 16.3 ± 0.1 <sup>#</sup>   | 16.2 ± 0.6 <sup>#</sup>   | 16.4 ± 2.1 <sup>#</sup>   | 16.8 ± 0.4 <sup>#</sup>    | 15.2 ± 0.3 <sup>#</sup>     | 17.0 ± 0.1 <sup>#</sup>   | 15.9 ± 0.1 <sup>#</sup>   | 16.9 ± 0.2 <sup>#</sup>   | 16.6 ± 0.4 <sup>#</sup>    |     |   |    |                          |     |   |    |    |     |  |  |
|                       | 14 w    | 2.3 ± 0.1 | 16.2 ± 0.4 <sup>#</sup> | 16.5 ± 0.2 <sup>#</sup>   | 15.0 ± 0.3 <sup>#^</sup>  | 15.1 ± 0.3 <sup>#^</sup>  | 15.1 ± 0.4 <sup>#^</sup>   | 14.5 ± 1.3 <sup>#**^^</sup> | 16.7 ± 0.1 <sup>#</sup>   | 15.3 ± 0.5 <sup>#^</sup>  | 16.8 ± 0.3 <sup>#</sup>   | 15.0 ± 0.1 <sup>#**^</sup> |     |   |    |                          |     |   |    |    |     |  |  |
|                       | 18 w    | 2.5 ± 0.1 | 16.5 ± 0.3 <sup>#</sup> | 16.2 ± 0.4 <sup>#</sup>   | 15.2 ± 0.3 <sup>#*</sup>  | 15.3 ± 0.1 <sup>#</sup>   | 15.0 ± 0.5 <sup>#*^</sup>  | 14.3 ± 1.0 <sup>#**^^</sup> | 15.2 ± 0.4 <sup>#*</sup>  | 15.2 ± 0.6 <sup>#*</sup>  | 16.2 ± 0.9 <sup>#</sup>   | 15.0 ± 0.6 <sup>#*^</sup>  |     |   |    |                          |     |   |    |    |     |  |  |
|                       | 22 w    | 2.4 ± 0.2 | 17.4 ± 0.2 <sup>#</sup> | 14.8 ± 0.3 <sup>#**</sup> | 15.3 ± 0.3 <sup>#**</sup> | 15.1 ± 0.3 <sup>#**</sup> | 16.2 ± 0.4 <sup>#**^</sup> | 15.1 ± 0.2 <sup>#**</sup>   | 14.9 ± 0.9 <sup>#**</sup> | 14.7 ± 0.6 <sup>#**</sup> | 15.2 ± 0.6 <sup>#**</sup> | 14.2 ± 0.1 <sup>#**</sup>  |     |   |    |                          |     |   |    |    |     |  |  |
| Food intake (g/day)   | 10 w    | 2.3 ± 0.1 | 3.3 ± 0.1 <sup>#</sup>  | 3.5 ± 0.1 <sup>#</sup>    | 3.6 ± 0.1 <sup>#</sup>    | 3.6 ± 0.5 <sup>#</sup>    | 3.6 ± 0.2 <sup>#</sup>     | 3.4 ± 0.2 <sup>#</sup>      | 3.3 ± 0.3 <sup>#</sup>    | 3.3 ± 0.1 <sup>#</sup>    | 3.5 ± 0.4 <sup>#</sup>    | 3.4 ± 0.3 <sup>#</sup>     |     |   |    |                          |     |   |    |    |     |  |  |
|                       | 14 w    | 2.5 ± 0.1 | 4.0 ± 0.3 <sup>#</sup>  | 3.3 ± 0.1 <sup>#*</sup>   | 3.5 ± 0.1 <sup>#*</sup>   | 3.4 ± 0.2 <sup>#*</sup>   | 3.7 ± 0.2 <sup>#</sup>     | 3.4 ± 0.4 <sup>#*</sup>     | 3.2 ± 0.2 <sup>#**</sup>  | 3.1 ± 0.1 <sup>#**</sup>  | 3.0 ± 0.1 <sup>#**</sup>  | 2.8 ± 0.1 <sup>#**</sup>   |     |   |    |                          |     |   |    |    |     |  |  |
|                       | 18 w    | 2.4 ± 0.1 | 3.8 ± 0.3 <sup>#</sup>  | 2.8 ± 0.1 <sup>**</sup>   | 3.2 ± 0.1 <sup>#**^</sup> | 3.4 ± 0.1 <sup>#**^</sup> | 3.3 ± 0.2 <sup>#**^</sup>  | 3.3 ± 0.1 <sup>#**^</sup>   | 2.7 ± 0.1 <sup>**</sup>   | 2.7 ± 0.1 <sup>**</sup>   | 2.6 ± 0.1 <sup>**</sup>   | 2.5 ± 0.1 <sup>**</sup>    |     |   |    |                          |     |   |    |    |     |  |  |
|                       | 22 w    | 2.1 ± 0.2 | 4.1 ± 0.1 <sup>#</sup>  | 2.5 ± 0.1 <sup>**</sup>   | 3.2 ± 0.3 <sup>#**^</sup> | 3.2 ± 0.1 <sup>#**^</sup> | 3.2 ± 0.2 <sup>#**^</sup>  | 3.2 ± 0.1 <sup>#**^</sup>   | 3.2 ± 0.1 <sup>#**^</sup> | 2.5 ± 0.1 <sup>**</sup>   | 2.3 ± 0.1 <sup>**</sup>   | 2.1 ± 0.1 <sup>**</sup>    |     |   |    |                          |     |   |    |    |     |  |  |

Data are presented as the mean ± SD (n = 6). <sup>#</sup>p < 0.05, <sup>\*\*</sup>p < 0.01 vs. Control; <sup>\*</sup>p < 0.05, <sup>\*\*</sup>p < 0.01 vs. Diabetes; <sup>^</sup>p < 0.05, <sup>^^</sup>p < 0.01 vs. Can.

**Supplementary Table 4. Influence of canagliflozin and puerarin on urine volume and urinary glucose excretion in diabetes mice**

|                                      | Age       |                          |                           | Pue (mg/kg)                  |                              |                             | Can + Pue (mg/kg of Pue)    |                              |                             |                             |                             |                              |
|--------------------------------------|-----------|--------------------------|---------------------------|------------------------------|------------------------------|-----------------------------|-----------------------------|------------------------------|-----------------------------|-----------------------------|-----------------------------|------------------------------|
|                                      | Control   | Diabetes                 | Can                       | 4                            | 10                           | 40                          | 100                         | 4                            | 10                          | 40                          | 100                         |                              |
| Urine volume (ml/day)                | 10 w      | 1.1 ± 0.1                | 29.9 ± 0.2 <sup>#</sup>   | 31.0 ± 0.8 <sup>#</sup>      | 31.0 ± 2.1 <sup>#</sup>      | 30.6 ± 1.2 <sup>#</sup>     | 30.5 ± 0.8 <sup>#</sup>     | 30.2 ± 2.4 <sup>#</sup>      | 30.0 ± 0.1 <sup>#</sup>     | 31.4 ± 0.4 <sup>#</sup>     | 30.3 ± 0.7 <sup>#</sup>     |                              |
|                                      | 12 w      | 1.3 ± 0.1                | 31.4 ± 0.3 <sup>#</sup>   | 31.7 ± 0.2 <sup>#</sup>      | 30.6 ± 0.3 <sup>#</sup>      | 30.8 ± 1.1 <sup>#</sup>     | 29.8 ± 0.4 <sup>#</sup>     | 29.8 ± 0.4 <sup>#</sup>      | 29.2 ± 1.5 <sup>#^</sup>    | 31.5 ± 0.4 <sup>#</sup>     | 30.0 ± 1.7 <sup>#</sup>     |                              |
|                                      | 14 w      | 1.3 ± 0.1                | 31.6 ± 0.2 <sup>#</sup>   | 30.4 ± 0.4 <sup>#**</sup>    | 30.1 ± 1.8 <sup>#</sup>      | 28.8 ± 0.4 <sup>#**^</sup>  | 27.6 ± 0.5 <sup>#**^</sup>  | 27.6 ± 0.5 <sup>#**^</sup>   | 29.6 ± 0.6 <sup>#*</sup>    | 29.5 ± 1.0 <sup>#**</sup>   | 27.5 ± 0.9 <sup>#**^</sup>  |                              |
|                                      | 16 w      | 1.3 ± 0.1                | 32.6 ± 0.8 <sup>#</sup>   | 29.9 ± 0.8 <sup>#**</sup>    | 30.4 ± 0.6 <sup>#**</sup>    | 30.9 ± 0.6 <sup>#**</sup>   | 30.1 ± 0.6 <sup>#**</sup>   | 30.1 ± 0.6 <sup>#**</sup>    | 29.1 ± 1.6 <sup>#**</sup>   | 29.1 ± 1.6 <sup>#**</sup>   | 28.0 ± 1.3 <sup>#**</sup>   | 27.2 ± 1.0 <sup>#**^</sup>   |
|                                      | 18 w      | 1.3 ± 0.1                | 31.5 ± 1.5 <sup>#</sup>   | 30.0 ± 0.5 <sup>#**</sup>    | 30.6 ± 0.6 <sup>#</sup>      | 30.7 ± 0.1 <sup>#</sup>     | 30.7 ± 0.1 <sup>#</sup>     | 29.5 ± 0.8 <sup>#</sup>      | 30.0 ± 0.7 <sup>#</sup>     | 29.6 ± 0.7 <sup>#</sup>     | 29.1 ± 0.7 <sup>#**</sup>   | 27.9 ± 2.9 <sup>#*</sup>     |
|                                      | 20 w      | 1.3 ± 0.1                | 32.5 ± 0.3 <sup>#</sup>   | 29.3 ± 0.2 <sup>#**</sup>    | 30.4 ± 0.4 <sup>#**</sup>    | 30.1 ± 0.5 <sup>#**</sup>   | 30.1 ± 0.5 <sup>#**</sup>   | 29.2 ± 0.9 <sup>#**</sup>    | 30.3 ± 0.4 <sup>#**</sup>   | 29.6 ± 0.7 <sup>#**</sup>   | 27.5 ± 0.3 <sup>#**^</sup>  | 26.9 ± 0.4 <sup>#**^</sup>   |
| Urinary glucose excretion (µmol/day) | 10 w      | 0.2 ± 0.1                | 263.1 ± 5.2 <sup>#</sup>  | 276.6 ± 9.7 <sup>#**</sup>   | 274.9 ± 15.6 <sup>#</sup>    | 283.8 ± 14.2 <sup>#</sup>   | 265.4 ± 3.0 <sup>#</sup>    | 277.0 ± 13.7 <sup>#</sup>    | 274.1 ± 9.9 <sup>#</sup>    | 280.3 ± 3.1 <sup>#**</sup>  | 279.4 ± 1.5 <sup>#</sup>    |                              |
|                                      | 12 w      | 0.2 ± 0.1                | 281.6 ± 0.7 <sup>#</sup>  | 202.4 ± 5.6 <sup>#**</sup>   | 244.1 ± 10.5 <sup>#**^</sup> | 236.8 ± 8.3 <sup>#**^</sup> | 236.8 ± 6.5 <sup>#**^</sup> | 243.0 ± 5.5 <sup>#**^</sup>  | 194.2 ± 8.5 <sup>#**</sup>  | 196.6 ± 4.7 <sup>#**</sup>  | 182.0 ± 23.7 <sup>#**</sup> |                              |
|                                      | 14 w      | 0.2 ± 0.1                | 275.2 ± 14.2 <sup>#</sup> | 163.2 ± 1.1 <sup>#**</sup>   | 265.6 ± 15.5 <sup>#</sup>    | 253.4 ± 18.2 <sup>#^</sup>  | 211.4 ± 6.3 <sup>#**^</sup> | 205.6 ± 2.7 <sup>#**^</sup>  | 145.8 ± 8.6 <sup>#**</sup>  | 165.1 ± 12.7 <sup>#**</sup> | 129.7 ± 0.9 <sup>#**^</sup> | 136.4 ± 14.5 <sup>#**^</sup> |
|                                      | 16 w      | 0.3 ± 0.1                | 268.3 ± 7.3 <sup>#</sup>  | 131.4 ± 3.9 <sup>#**</sup>   | 253.3 ± 21.0 <sup>#^</sup>   | 244.9 ± 12.1 <sup>#^</sup>  | 235.0 ± 4.1 <sup>#**^</sup> | 218.5 ± 20.2 <sup>#**^</sup> | 131.0 ± 8.8 <sup>#**</sup>  | 113.7 ± 2.7 <sup>#**</sup>  | 107.1 ± 10.5 <sup>#**</sup> | 108.9 ± 19.6 <sup>#**</sup>  |
|                                      | 18 w      | 0.2 ± 0.1                | 271.2 ± 21.2 <sup>#</sup> | 102.6 ± 5.7 <sup>#**</sup>   | 251.0 ± 7.6 <sup>#**</sup>   | 247.4 ± 18.5 <sup>#**</sup> | 232.1 ± 3.8 <sup>#**^</sup> | 206.4 ± 15.2 <sup>#**^</sup> | 100.1 ± 14.0 <sup>#**</sup> | 79.5 ± 10.5 <sup>#**</sup>  | 79.3 ± 0.4 <sup>#**</sup>   | 64.5 ± 10.8 <sup>#**^</sup>  |
|                                      | 20 w      | 0.2 ± 0.1                | 278.3 ± 3.6 <sup>#</sup>  | 71.6 ± 1.5 <sup>#**</sup>    | 256.2 ± 7.1 <sup>#**^</sup>  | 246.8 ± 4.3 <sup>#**^</sup> | 226.6 ± 0.7 <sup>#**^</sup> | 203.7 ± 17.3 <sup>#**^</sup> | 90.2 ± 5.9 <sup>#**^</sup>  | 52.9 ± 2.0 <sup>#**^</sup>  | 32.9 ± 5.7 <sup>#**^</sup>  | 40.8 ± 5.1 <sup>#**^</sup>   |
| 22 w                                 | 0.3 ± 0.1 | 293.3 ± 5.1 <sup>#</sup> | 44.3 ± 2.0 <sup>#**</sup> | 249.6 ± 11.2 <sup>#**^</sup> | 235.4 ± 2.8 <sup>#**^</sup>  | 219.2 ± 0.1 <sup>#**^</sup> | 207.4 ± 1.5 <sup>#**^</sup> | 46.3 ± 7.8 <sup>#**</sup>    | 30.3 ± 0.7 <sup>#**</sup>   | 11.6 ± 1.8 <sup>#**^</sup>  | 12.0 ± 4.0 <sup>#**^</sup>  |                              |

Data are presented as the mean ± SD (n = 6). <sup>#</sup> p < 0.05, <sup>#\*</sup> p < 0.01 vs. Control; <sup>#\*</sup> p < 0.05, <sup>#\*\*</sup> p < 0.01 vs. Diabetes; <sup>^</sup> p < 0.05, <sup>^^</sup> p < 0.01 vs. Can.
